# Supplementary material for: Evaluating Jordan's Antimicrobial Resistance National Action Plan (2018-2022) Implementation: Progress and Recommendations
Source: Research Square preprint supplement (doi:10.21203/rs.3.rs-6496101/v1), 2025-04-25
Supplement: Supplementary file 1 [file be7bf5220d443d31c1dac6b7.docx]

**Data Collection Tool**

| **Activity** | | **Sector** | **No. of Indicators** | **Indicator** | **Answer** | | | **No answer** |
| --- | --- | --- | --- | --- | --- | --- | --- | --- |
| **Yes** | **Partial** | **No** |
| 1. ***First objective: Awareness*** | | | | | | | | |
| 1. | Improve awareness and change behaviors regarding hygiene and the appropriate use of antibiotics among the public, animal and human health care providers, farmers, and students. (Strategic obj) | Multi-sectoral | 3 | % of target groups have their awareness increased on the appropriate use of antibiotics |  |  |  |  |
| % of target groups have their behavior changed positively |  |  |  |  |
| % of community have their awareness increased on hygiene |  |  |  |  |
| 2. | Creation and implementation of a national awareness and behavior change program for hygiene and appropriate use of antibiotics (Strategic intervention) | Multi-sectoral | 1 | Endorsement of the program by the official entities |  |  |  |  |
| 3. | Conducting a mapping exercise to identify the key relevant stakeholders and target groups and behavior change experts (Activities) | Multi-sectoral | 1 | Mapping report generated |  |  |  |  |
| 4. | Conducting quantitative and qualitative studies to understand the current situation | Human Health | 1 | Study conducted; communication objectives drafted |  |  |  |  |
| 5. | Developing multi-sectorial awareness and behavior change plan with the required resources and budget | Multi-sectoral | 1 | Awareness plan developed |  |  |  |  |
| 6. | Development of a behavior change, communication, and awareness-raising strategy | Multi-sectoral | 1 | Strategy developed for behavioral change |  |  |  |  |
| 7. | Capacity building for the responsible individuals/ agencies implementing the plan | Multi-sectoral | 3 | No. of trainings conducted |  |  |  |  |
| No of trainees attended |  |  |  |  |
| All trainees have their knowledge and skills increased |  |  |  |  |
| 8. | Collaborating and communicating with associations such as agricultural, and medical. | Animal Health | 1 | No of meetings conducted |  |  |  |  |
| 9. | Conducting mass awareness and community campaigns regarding hygiene and the appropriate use and disposal of antibiotics for both animal and human health fields. | Multi-sectoral | 2 | No. of people reached during campaigns |  |  |  |  |
| No. of campaigns conducted |  |  |  |  |
| 10. | Creation of a motivating and supportive environment for raising awareness and behavioral change | Multi-sectoral | 2 | No. of people reached during campaigns |  |  |  |  |
| No. of campaigns conducted |  |  |  |  |
| 11. | Conducting field orientation visits for farmers regarding vaccination, biosecurity, feed additives, water purifications, antibiotics use, etc. | Animal Health | 2 | No. of farmers reached |  |  |  |  |
| No. of field visits |  |  |  |  |
| 12. | Developing accreditation and awarding systems with the legal bodies to recognize compliance | Multi-sectoral | 1 | Accreditation system developed |  |  |  |  |
| 13. | Conducting hospital-based interventions | Human Health | 1 | No. of hospital-based interventions made |  |  |  |  |
| 14. | Conducting activities by the community health committees targeting the public, students, mothers, and youth | Human Health | 2 | No. of activities conducted by the community health committees |  |  |  |  |
| No. of target groups reached |  |  |  |  |
| 15. | Monitoring the effectiveness of the conducted educational activities | Multi-sectoral | 1 | Monitoring reports submitted |  |  |  |  |
| 1. ***Second objective: Surveillance*** | | | | | | | | |
| 1. | Establishment of a national committee of One health. Nominate representatives from all relevant sectors involved with the One Health approach [human (private, public, universities, RMS), animals, food, agriculture, and environmental] | Multi-sectoral | 1 | Committee established |  |  |  |  |
| 2. | Reviewing and modifying the terms of reference (TOR) | Multi-sectoral | 1 | ToR Modified |  |  |  |  |
| 3. | Establishing a technical advisory group (TAG) from all relevant sectors to promote collaboration and integration of all relevant sectors | Multi-sectoral | 1 | TAG established |  |  |  |  |
| 4. | Establishing a national system for data collection, management, networking, and dissemination of information in a real-time manner | Human Health | 1 | National system developed |  |  |  |  |
| 5. | Upgrading the existing surveillance system to accommodate global needs for data collection and reporting (suggest including the antimicrobial surveillance report with the existing MOH surveillance report). | Human Health | 1 | Development of process document |  |  |  |  |
| 6. | Developing a notification system for priority pathogens | Animal Health | 1 | Development of a notification system for priority pathogens established |  |  |  |  |
| 7. | Designating Surveillance sites for all sectors | Human Health | 1 | Number of sites designated |  |  |  |  |
| 8. | Developing or adapting assessment tools for sites and labs | Human Health | 1 | Assessment tool developed |  |  |  |  |
| 9. | Activating and strengthening the national laboratory group | Human Health | 1 | Activation of national lab group |  |  |  |  |
| 10. | Conducting situational analysis of the lab services across the country | Human Health | 1 | Situation analysis on labs for AMR |  |  |  |  |
| 11. | Unifying national laboratory standards and Guidelines in accordance with international standards (Clinical institute and laboratory standards CLSI, etc.) | Human Health | 1 | National Lab Standards available |  |  |  |  |
| 12. | Developing laboratory networking system | Human Health | 1 | National lab network established |  |  |  |  |
| 13. | Monitoring and evaluation of laboratory services | Human Health | 1 | M&E Tool developed |  |  |  |  |
| 14. | Developing human resources policy for sustainable, sufficient, and competent staff | Human Health | 1 | HR Policy developed |  |  |  |  |
| 15. | Developing a strategic plan to attraction and retention of staff in laboratory services | Human Health | 1 | HR Plan developed |  |  |  |  |
| 16. | Developing and using an appropriate training/competence development program | Human Health | 1 | Training module developed |  |  |  |  |
| 17. | Strengthening external partnerships for technical and financial assistance | Human Health | 1 | Twinning projects forged |  |  |  |  |
| 18. | Participation in the Global Antimicrobial Resistance Surveillance System (GLASS) | Human Health | 1 | Participation in GLASS |  |  |  |  |
| 19. | Upgrading the capacity of the national reference lab to oversee the peripheral lab and to detect new emerging infectious diseases. Seeking accreditation | Human Health | 1 | Accreditation process |  |  |  |  |
| 20. | Continuous improvement for lab technicians' capacities | Human Health | 1 | Mechanism for improving capacity of lab technicians |  |  |  |  |
| 21. | Sustainable procurement for lab supplies | Human Health | 1 | Procurement Plan |  |  |  |  |
| 22. | Follow international standards in referral shipping for panel of NEQAS | Human Health | 1 | Referral shipping |  |  |  |  |
| 23. | Ensure participation of all labs in EQAS | Human Health | 1 | No of labs participating in NEQAS |  |  |  |  |
| 24. | Nominating representatives from all relevant sectors for One Health approach [human (private and public, universities, RMS), animals, food, agriculture, and environmental] | Human Health | 1 | Establishment of National committee on one health |  |  |  |  |
| 25. | Establish a TAG from all relevant sectors to promote collaboration and integration of all relevant sectors | Human Health | 1 | To establish TAG |  |  |  |  |
| 26. | Providing epidemiological capacity for data analysis | Human Health | 1 | No. of trained FETP |  |  |  |  |
| 27. | Participation in the Global Antimicrobial Resistance and Use Surveillance System GLASS - WHONET software | Human Health | 1 | No of labs trained on WHONET and reported to GLASS |  |  |  |  |
| 1. ***Third objective: Infection Reduction*** | | | | | | | | |
| 1. | Implementing the infection control program | Human Health | 2 | Percentage of hospitals implementing the advanced infection control program through an evidence-based surveillance program |  |  |  |  |
| Percentage of decrease in the rates of healthcare-associated infection at the national level |  |  |  |  |
| 2. | Implementing the Antimicrobial Stewardship Program | Human Health | 1 | Percentage of decrease in the rate of multiple drug resistance organisms at the national level |  |  |  |  |
| 3. | Reform of the National Committee | Multi-sectoral | 1 | Reforming the Steering committee |  |  |  |  |
| 4. | Establishing a licensing program for infection control practitioners | Human Health | 1 | Percentage of licensed practitioners |  |  |  |  |
| 5. | Establishment of a national healthcare-associated infections (HAI) surveillance center | Human Health | 1 | % of sites from where surveillance data form the surveillance center available |  |  |  |  |
| 6. | Understanding the patterns of resistance of microorganisms | Human Health | 1 | Percentage of resistance for microbiologically important bacteria |  |  |  |  |
| 7. | Training school nurses on the prevention of community diseases | Human Health | 1 | Percentage of trained nurses |  |  |  |  |
| 1. ***Forth objective: Rational Consumption*** | | | | | | | | |
| 1. | Revising international and local guidelines and protocols to establish national ones | Multi-sectoral | 1 | Establishment of national guidelines |  |  |  |  |
| 2. | Issuing a decree to enforce the implementation of local guidelines and protocols on a national level | Human Health | 1 | Formal decree issued |  |  |  |  |
| 3. | Training the relevant health care providers (HCP) on the newly implemented guidelines | Human Health | 1 | % of HCP trained |  |  |  |  |
| 4. | Implementing the national electronic health system (one Jordanian One Health Record) | Human Health | 1 | % of Jordanians in national electronic health system |  |  |  |  |
| 5. | Establishment a National AMS Advisory Committee to provide strategic advice to ensures that work undertaken in this area occurs in a Nationally coordinated way | Multi-sectoral | 1 | Formation of the National AMS Advisory Committee |  |  |  |  |
| 6. | Participation in the Global Health Network AMS | Human Health | 1 | Participation in global health network of AMS |  |  |  |  |
| 7. | Performing regular training and qualification workshops for relevant health care professionals | Human Health | 1 | % of HCP trained |  |  |  |  |
| 8. | Categorizing antimicrobials in accordance with restricted antimicrobials and setting prescribing and dispensing limitations accordingly | Human Health | 1 | % of categorized antimicrobials |  |  |  |  |
| 9. | Establishing a detailed, species-specific guidelines to further support antimicrobial stewardship in animal health settings | Animal Health | 1 | Available guidelines |  |  |  |  |
| 10. | Training the relevant HCP on ASP | Human Health | 1 | % of trained HCP |  |  |  |  |
| 11. | Providing special environment hazards safe containers to pharmacies and health institutions and fund for disposal | Human Health | 1 | % of covered HC units |  |  |  |  |
| 12. | Utilizing the features of the electronic health system EHS software (Hakeem) | Human Health | 1 | % of health institutions utilizing Hakeem |  |  |  |  |
| 13. | Establishing a national AMS database | Human Health | 1 | Development of a software for national database on AMS |  |  |  |  |
| 14. | Training on the database software | Human Health | 1 | % of trained personnel |  |  |  |  |
| 15. | Adopting and establish the database | Human Health | 1 | % of health institutions adopting database |  |  |  |  |
| 16. | Monitoring antibiotic usage and taking action to improve the effectiveness of rational antimicrobials stewardship AMS programs | Human Health | 1 | % of institutions complied |  |  |  |  |
| 17. | Providing patients/ owners with adequate and proper counselling on how to use antibiotics at the time of prescribing and dispensing | Human Health | 1 | % of patients counselled |  |  |  |  |
| 18. | Enforcing the existing local laws and regulations for veterinarians related to veterinary clinics, animal farms, and slaughterhouses | Animal Health | 1 | Enforcing a formal decree on professionals |  |  |  |  |
| 19. | Training veterinarians to become qualified to supervise slaughterhouses to inspect animals before and after slaughtering. Also, to ensure that there is no random slaughtering for sick animals or animals that have not fulfilled the withdrawal period | Animal Health | 1 | % of veterinarians trained |  |  |  |  |
| 20. | Ensuring dispensation only the quantity of antibiotics prescribe | Human Health | 1 | % of compliance with dispensing of antimicrobials |  |  |  |  |
| 21. | Establishing a qualification program for physicians prescribing antimicrobials | Human Health | 1 | % of HCP trained |  |  |  |  |
| 22. | Removing the selling rights of veterinary products from non-veterinarians, such as agricultural engineers (animal product specialists) | Animal Health | 1 | Formal decree |  |  |  |  |
| 23. | Regulating and controlling organic food production facilities | Multi-sectoral | 1 | % of facilities regulated |  |  |  |  |

| 1. ***Fifth objective: Research*** | | | | | | | | |
| --- | --- | --- | --- | --- | --- | --- | --- | --- |
|  | **Activity** | **Sector** | **No. of Indicators** | **Indicator** | **Answer** | | | **No Answer** |
| **Yes** | **Partial** | **No** |
| 1. | Supporting research in AMR to assist policy setting in containing AMR | Multi-sectoral | 1 | AMR research outcome policy changed |  |  |  |  |
| 2. | Developing AMR NAP research advisory subcommittee | Multi-sectoral | 1 | Committee established |  |  |  |  |
| 3. | Organizing meeting with the Ministry of Agriculture  (MOA) to Establish IRB & ACOC for animal research | Animal Health | 1 | IRB establishment at MOA |  |  |  |  |
| 4. | Writing a proposal to collect previous research work in AMR | Multi-sectoral | 1 | Previous research work database |  |  |  |  |
| 5. | Meeting with Shouman, UJ, JUST, and KHCC to arrange for a reward for the best researcher | Multi-sectoral | 1 | Establish reward for best researcher |  |  |  |  |
| 6. | Encouraging the private sector to participate in AMR research | Multi-sectoral | 1 | Private sector engagement in research subcommittee proposed |  |  |  |  |
| 7. | Organizing a meeting with the "Research Scientific Fund" to put research in AMR and one health concept on their priority & encourage funding | Multi-sectoral | 1 | Identifying AMR research priorities and fund |  |  |  |  |
| 8. | Encouraging academia to collaborate with the public sector (MOA, MOH, Royal Medical Service) in research | Multi-sectoral | 1 | Promote Inter-sectoral collaboration |  |  |  |  |
| 9. | Organizing research training for prospective and aspiring researchers through workshops and courses | Multi-sectoral | 1 | Provide research training for prospective and aspiring researchers provided |  |  |  |  |
| 10. | Organizing regular conferences on AMR/One health, including topics on research issues | Multi-sectoral | 1 | Organize regular national conferences on AMR including research issues organized. |  |  |  |  |
| 11. | Encourage participation in international meetings and conferences | Multi-sectoral | 1 | Encourage participation international meeting and conferences |  |  |  |  |
| 12. | Improving facilities in Central Public Health Laboratory (CPHL) to do work on AMR activities | Human Health | 1 | Improve facilities in CPHL |  |  |  |  |
